# Supplementary material for: Addressing selection biases within electronic health record data for estimation of diabetes prevalence among New York City young adults: a cross-sectional study
Source: PubMed Central journal article supplement — BMJ Public Health. 2024 Oct 23;2(2):e001666. doi: 10.1136/bmjph-2024-001666 (PMC11578099; doi:10.1136/bmjph-2024-001666), 2024-10-23
Supplement: NIHMS2030489-supplement-Supp1.pdf [file NIHMS2030489-supplement-Supp1.pdf]

# Appendix I

## Data Illustration

### **Sensitivity Analyses for Model Specifications:**

- Main multilevel logistic regression model specification (MLRP): including fixed effects for sex, age category, and Medicaid insurance status and random effects for race/ethnicity and PUMA.
- Alternate specification 1 (MLRP – ACS): including fixed effects for sex, age category, and Medicaid insurance, random effects for race/ethnicity, race/ethnicity\*sex interaction, and PUMA, and neighborhood-level fixed effects for ACS variables (% living below the federal poverty level, % with a bachelor’s degree or higher, % unemployed, % foreign-born).
- Alternate specification 2 (MLRP – CHS): including fixed effects for sex, age category, and Medicaid insurance, random effects for race/ethnicity, race/ethnicity\*sex interaction, and PUMA, and neighborhood-level fixed effects for ACS variables and NYC CHS variables (adult diabetes prevalence, adult obesity prevalence, and % of adults with a primary care physician).

### **Sensitivity Analyses for NYU Service Area Definitions:**

- Geographic Definition (main text analyses): a public health-relevant approach including all PUMAs within the New York City boundaries (n = 55).
- Geographic & Penetration Definition: a hybrid public health-relevant/data-driven approach including all PUMAs within New York City Counties with >5% penetration (excluding Bronx County) (n = 45).
- Adjacent Neighborhood Definition: a data-driven approach including all PUMAs with >10% penetration and contiguous PUMAs (n = 37).
- Data Penetration Definition: a data-driven approach including all PUMAs with >10% penetration (n = 29).

**Appendix Table 1: EHR-Based Diabetes Prevalence Estimates by Demographic Subgroups, NYC Young Adults Aged 18-44 Years.**

|             | Crude | Raking | Post-Stratification | MLRP  |
|-------------|-------|--------|---------------------|-------|
| <b>Sex</b>  |       |        |                     |       |
| Female      | 2.93% | 3.41%  | 3.36%               | 3.34% |
| Male        | 3.35% | 3.69%  | 3.72%               | 3.83% |
| <b>Race</b> |       |        |                     |       |
| Black       | 4.23% | 4.50%  | 4.43%               | 4.38% |
| White       | 2.38% | 2.45%  | 2.44%               | 2.43% |
| <b>Age</b>  |       |        |                     |       |
| 18-29       | 1.88% | 2.13%  | 2.25%               | 2.29% |
| 30-44       | 3.82% | 4.64%  | 4.53%               | 4.58% |

**Appendix Table 2: Demographic Profile of the NYU Sample and General Population under Different Service Area Definitions, NYC Young Adults Aged 18-44 Years.**

|                  | Geographic <sup>a</sup> |       | Geographic & Penetrance <sup>b</sup> |       | Adjacent Neighborhoods <sup>c</sup> |       | EHR Penetrance <sup>d</sup> |       |
|------------------|-------------------------|-------|--------------------------------------|-------|-------------------------------------|-------|-----------------------------|-------|
|                  | Pop.                    | Samp. | Pop.                                 | Samp. | Pop.                                | Samp. | Pop.                        | Samp. |
| <b>Sex</b>       |                         |       |                                      |       |                                     |       |                             |       |
| Female           | 51.2%                   | 62.2% | 51.3%                                | 62.1% | 51.2%                               | 62.2% | 51.6%                       | 62.1% |
| Male             | 48.8%                   | 37.8% | 48.7%                                | 37.9% | 48.8%                               | 37.8% | 48.4%                       | 37.9% |
| <b>Race</b>      |                         |       |                                      |       |                                     |       |                             |       |
| Black            | 20.3%                   | 12.7% | 18.7%                                | 12.2% | 17.7%                               | 10.8% | 14.3%                       | 8.9%  |
| Latino           | 29.6%                   | 19.1% | 23.9%                                | 18.1% | 22.3%                               | 17.9% | 17.6%                       | 16.3% |
| Other            | 18.1%                   | 16.1% | 20.5%                                | 16.4% | 20.1%                               | 16.3% | 20.0%                       | 15.9% |
| White            | 32.0%                   | 52.1% | 36.8%                                | 53.4% | 39.8%                               | 55.0% | 48.1%                       | 58.9% |
| <b>Age</b>       |                         |       |                                      |       |                                     |       |                             |       |
| 18-29            | 43.6%                   | 37.5% | 42.9%                                | 37.6% | 42.4%                               | 37.8% | 41.6%                       | 37.8% |
| 30-44            | 56.4%                   | 62.5% | 57.1%                                | 62.4% | 57.6%                               | 62.2% | 58.4%                       | 62.2% |
| <b>Insurance</b> |                         |       |                                      |       |                                     |       |                             |       |
| Non-Medicaid     | 74.2%                   | 77.8% | 77.5%                                | 77.8% | 77.8%                               | 77.5% | 80.5%                       | 78.2% |
| Medicaid         | 25.8%                   | 22.2% | 22.5%                                | 22.2% | 22.2%                               | 22.5% | 19.5%                       | 21.8% |

<sup>a</sup> *Geographic Definition: includes all PUMAs within the New York City boundaries (n = 55).*

<sup>b</sup> *Geographic & Penetrance Definition: includes all PUMAs within New York City Counties with >5% penetrance (excludes Bronx County) (n = 45).*

<sup>c</sup> *Adjacent Neighborhood Definition: includes all PUMAs with >10% penetrance and contiguous PUMAs (n = 37).*

<sup>d</sup> *Data Penetrance Definition: includes all PUMAs with >10% penetrance (n = 29).*

*Abbreviations: Pop. = general population; Samp. = EHR sample.*

**Appendix Table 3: Overall Diabetes Prevalence Estimates (and 95% CIs) under Different Service Area Definitions, NYC Young Adults Aged 18-44 Years.**

|                            | <b>Geographic<sup>a</sup></b> | <b>Geographic &amp; Penetration<sup>b</sup></b> | <b>Adjacent Neighborhoods<sup>c</sup></b> | <b>Data Penetration<sup>d</sup></b> |
|----------------------------|-------------------------------|-------------------------------------------------|-------------------------------------------|-------------------------------------|
| Gold Standard <sup>e</sup> | 3.33% (3.02-3.67)             | 3.09% (2.76-3.46)                               | 2.90% (2.56-3.29)                         | 2.47% (2.13-2.88)                   |
| Crude                      | 3.09% (3.04-3.14)             | 3.01% (2.96-3.07)                               | 2.98% (2.93-3.04)                         | 2.91% (2.86-2.96)                   |
| Raking                     | 3.55% (3.46-3.63)             | 3.17% (3.11-3.23)                               | 3.14% (3.07-3.20)                         | 2.97% (2.91-3.03)                   |
| Poststratification         | 3.54% (3.43-3.64)             | 3.16% (3.09-3.23)                               | 3.11% (3.04-3.18)                         | 2.96% (2.89-3.03)                   |
| MLRP <sup>f</sup>          | 3.55% (3.47-3.63)             | 3.19% (3.13-3.25)                               | 3.15% (3.08-3.22)                         | 2.99% (2.92-3.04)                   |
| MLRP – ACS <sup>g</sup>    | 3.59% (3.51-3.67)             | 3.20% (3.13-3.26)                               | 3.16% (3.09-3.22)                         | 2.99% (2.93-3.05)                   |
| MLRP – CHS <sup>h</sup>    | 3.58% (3.50-3.66)             | 3.20% (3.14-3.25)                               | 3.16% (3.09-3.22)                         | 2.99% (2.92-3.04)                   |

<sup>a</sup> *Geographic Definition: includes all PUMAs within the New York City boundaries (n = 55).*

<sup>b</sup> *Geographic & Penetration Definition: includes all PUMAs within New York City Counties with >5% penetration (excludes Bronx County) (n = 45).*

<sup>c</sup> *Adjacent Neighborhood Definition: includes all PUMAs with >10% penetration and contiguous PUMAs (n = 37).*

<sup>d</sup> *Data Penetration Definition: includes all PUMAs with >10% penetration (n = 29).*

<sup>e</sup> *Gold standard prevalence estimates from NYC Community Health Survey 2015-2020 data.*

<sup>f</sup> *Multilevel logistic regression model including fixed effects for sex, age category, and Medicaid insurance status, random effects for race/ethnicity and PUMA*

<sup>g</sup> *Multilevel logistic regression model including fixed effects for sex, age category, and Medicaid insurance, random effects for race/ethnicity, race/ethnicity\*sex interaction, and PUMA, and neighborhood-level fixed effects for ACS variables (% living below the federal poverty level, % with a bachelor's degree or higher, % unemployed, % foreign-born).*

<sup>h</sup> *Multilevel logistic regression model including fixed effects for sex, age category, and Medicaid insurance, random effects for race/ethnicity, race/ethnicity\*sex interaction, and PUMA, and neighborhood-level fixed effects for ACS variables and NYC CHS variables (adult diabetes prevalence, adult obesity prevalence, and % of adults with a primary care physician).*

**Appendix Table 4: Relative Difference in EHR-Based Diabetes Prevalence Estimates from Gold Standard under Different Service Area Definitions, NYC Young Adults Aged 18-44 Years.**

|                         | <b>Geographic<sup>a</sup></b> | <b>Geographic &amp; Penetrance<sup>b</sup></b> | <b>Adjacent Neighborhoods<sup>c</sup></b> | <b>Data Penetrance<sup>d</sup></b> |
|-------------------------|-------------------------------|------------------------------------------------|-------------------------------------------|------------------------------------|
| Crude                   | -7.88%                        | -2.58%*                                        | 2.69%*                                    | 14.9%                              |
| Raking                  | 6.02%*                        | 2.46%*                                         | 7.52%                                     | 16.6%                              |
| Poststratification      | 5.75%*                        | 2.09%*                                         | 6.77%                                     | 16.3%                              |
| MLRP <sup>e</sup>       | 6.16%*                        | 3.11%*                                         | 7.81%                                     | 17.1%                              |
| MLRP – ACS <sup>f</sup> | 7.05%                         | 3.40%*                                         | 8.02%                                     | 17.1%                              |
| MLRP – CHS <sup>g</sup> | 6.96%                         | 3.34%*                                         | 8.04%                                     | 17.1%                              |

<sup>a</sup> *Geographic Definition: includes all PUMAs within the New York City boundaries (n = 55).*

<sup>b</sup> *Geographic & Penetrance Definition: includes all PUMAs within New York City Counties with >5% penetrance (excludes Bronx County) (n = 45).*

<sup>c</sup> *Adjacent Neighborhood Definition: includes all PUMAs with >10% penetrance and contiguous PUMAs (n = 37).*

<sup>d</sup> *Data Penetrance Definition: includes all PUMAs with >10% penetrance (n = 29).*

<sup>e</sup> *Multilevel logistic regression model including fixed effects for sex, age category, and Medicaid insurance status, random effects for race/ethnicity and PUMA*

<sup>f</sup> *Multilevel logistic regression model including fixed effects for sex, age category, and Medicaid insurance, random effects for race/ethnicity, race/ethnicity\*sex interaction, and PUMA, and neighborhood-level fixed effects for ACS variables (% living below the federal poverty level, % with a bachelor's degree or higher, % unemployed, % foreign-born).*

<sup>g</sup> *Multilevel logistic regression model including fixed effects for sex, age category, and Medicaid insurance, random effects for race/ethnicity, race/ethnicity\*sex interaction, and PUMA, and neighborhood-level fixed effects for ACS variables and NYC CHS variables (adult diabetes prevalence, adult obesity prevalence, and % of adults with a primary care physician).*

*\*Reject the null hypothesis of the TOST, or equivalent to the gold standard within equivalence bounds of 0.005.*

## Simulations

### Simulation Scenario 1:

- Selection model (individual  $i$  in Sex\*Race group  $k$ ):
  - $\text{Logit}(\text{odds}_{\text{selection}}) = -0.11 - 0.60\text{Race}_{\text{NHB}} - 0.34\text{Race}_{\text{HIS}} - 0.54\text{Race}_{\text{OTH}} - 0.13\text{Age}_{18-29} - 0.05\text{Distance}_1 - 0.60\text{Distance}_2 - 1.39\text{Distance}_3 - 0.39\text{Sex}_{\text{male}} - 0.36U_1 + u_k$
  - $u_k \sim N(0,0.3)$
- Diabetes model (individual  $i$  in neighborhood cluster  $j$ ):
  - $\text{Logit}(\text{odds}_{\text{DM}}) = -3.91 + 1.32\text{Age}_{30-44} - 0.49\text{Sex}_{\text{female}} + 0.59\text{Race}_{\text{NHB}} + 0.81\text{Race}_{\text{HIS}} + 0.52\text{Race}_{\text{OTH}} + 0.41\text{Sex}*\text{Race}_{\text{female,NHB}} + 0.69U + u_j$
  - $u_j \sim N(0,0.5)$
- $U$  model (individual  $i$ ):
  - $\text{Logit}(\text{odds}_U) = -0.36 + 0.05\text{Sex}_{\text{female}} + 0.13\text{Race}_{\text{NHB}} + 0.21\text{Race}_{\text{HIS}} + 0.15\text{Race}_{\text{OTH}}$

### Simulation Scenario 2:

- Selection model (individual  $i$  in Sex\*Race group  $k$ ):
  - $\text{Logit}(\text{odds}_{\text{selection}}) = -0.11 - 0.60\text{Race}_{\text{NHB}} - 0.34\text{Race}_{\text{HIS}} - 0.54\text{Race}_{\text{OTH}} - 0.13\text{Age}_{18-29} - 0.05\text{Distance}_1 - 0.60\text{Distance}_2 - 1.39\text{Distance}_3 - 0.39\text{Sex}_{\text{male}} - \beta_1\text{DM}_1 + u_k$
  - $u_k \sim N(0,0.3)$ 
    - $\beta_1$  modified at the levels of 0.33, 0.67, 1.0, 1.5, and 3.0
- Diabetes model (individual  $i$  in neighborhood cluster  $j$ ):
  - $\text{Logit}(\text{odds}_{\text{DM}}) = -3.91 + 1.32\text{Age}_{30-44} - 0.49\text{Sex}_{\text{female}} + 0.59\text{Race}_{\text{NHB}} + 0.81\text{Race}_{\text{HIS}} + 0.52\text{Race}_{\text{OTH}} + 0.41\text{Sex}*\text{Race}_{\text{female,NHB}} + 0.69U + u_j$
  - $u_j \sim N(0,0.5)$
- $U$  model (individual  $i$ ):
  - $\text{Logit}(\text{odds}_U) = -0.36 + 0.05\text{Sex}_{\text{female}} + 0.13\text{Race}_{\text{NHB}} + 0.21\text{Race}_{\text{HIS}} + 0.15\text{Race}_{\text{OTH}}$

# Appendix Figure 1: Relative Bias in the Neighborhood-Level EHR-Based Estimates vs. the True Diabetes Prevalence by Simulation Scenario.

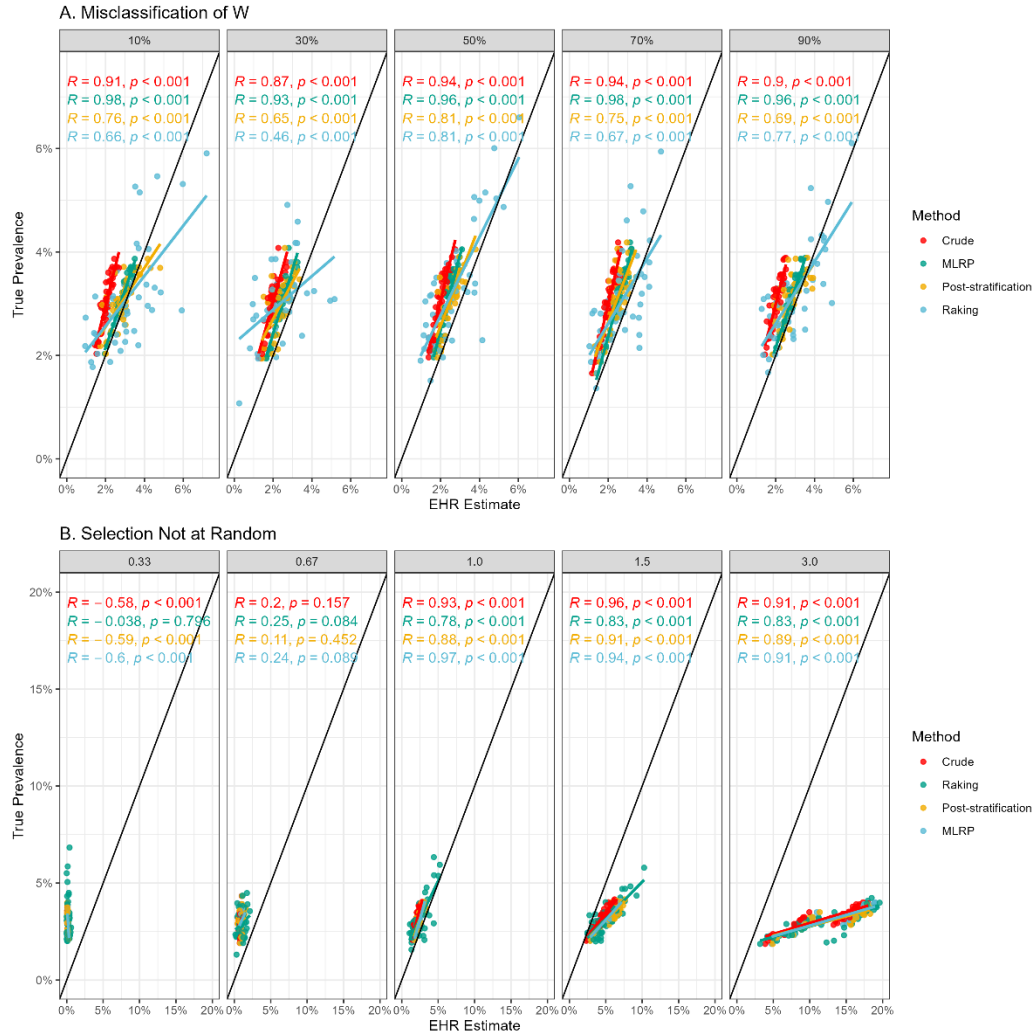

Each point represents a neighborhood. Panel A: Scenario 1 modified the level of misclassification of the auxiliary variable  $W$  compared to the unobserved variable  $U$ ; Panel B: Scenario 2 modified the association between diabetes and selection ( $OR_{DM}$ ).

**Appendix Table 5: Coverage in Overall EHR-Based Estimates by Adjustment Method and Simulation Scenario.**

| <b>Sample Inclusion Criteria</b> | <b>Crude</b> | <b>Raking</b> | <b>Post-Stratification</b> | <b>MLRP</b> |
|----------------------------------|--------------|---------------|----------------------------|-------------|
| <b>Scenario 1<sup>a</sup></b>    |              |               |                            |             |
| 10%                              | 2%           | 68%           | 53%                        | 65%         |
| 30%                              | 1%           | 16%           | 3%                         | 11%         |
| 50%                              | 0%           | 9%            | 6%                         | 1%          |
| 70%                              | 0%           | 18%           | 0%                         | 8%          |
| 90%                              | 0%           | 61%           | 39%                        | 62%         |
| <b>Scenario 2<sup>b</sup></b>    |              |               |                            |             |
| 0.33                             | 0%           | 0%            | 0%                         | 0%          |
| 0.67                             | 0%           | 0%            | 0%                         | 0%          |
| 1.00                             | 1%           | 7%            | 4%                         | 6%          |
| 1.50                             | 22%          | 0%            | 0%                         | 0%          |
| 3.00                             | 0%           | 0%            | 0%                         | 0%          |
| 0.33                             | 0%           | 0%            | 0%                         | 0%          |

<sup>a</sup> Scenario 1 modified the level of misclassification of the auxiliary variable *W* compared to the unobserved variable *U*.

<sup>b</sup> Scenario 2 modified the association between diabetes and selection ( $OR_{DM}$ ).
